1 **Natural is divine: Religious leaders' nuanced views on**  
2 **birth spacing and contraceptives in Sierra Leone -**  
3 **qualitative insights**

4

5

6 Regina Yillah<sup>1 †</sup>, Florence Bull<sup>2 †</sup>, Alhaji Sawneh<sup>1</sup>, Beryl Reindorf<sup>4 †</sup>, Hamid Turay<sup>1 †</sup>, Haja Wurie<sup>1</sup>,

7 Mary Hodges<sup>3 †</sup>

8

9

10 <sup>1</sup> Institute for Development (IfD), Freetown, Western Area, Sierra Leone

11 <sup>2</sup> Christian Health Association of Sierra Leone, Freetown, Western Area, Sierra Leone

12 <sup>3</sup> Njala University, Njala, Moyamba District, Sierra Leone

13

14

15 \*Corresponding author

16 Email: [rmyillah@ifdsl.org](mailto:rmyillah@ifdsl.org)

17

18

19 † These authors contributed equally to this work

20

21 & These authors also contributed equally to this work

## 22 **Abstract**

23 This research explored the viewpoints of 116 religious leaders in Sierra Leone including 32 Muslims  
24 and 84 Christians from nine different denominations. The study's primary objectives were to  
25 understand their perspectives on family planning, modern contraceptives, sexual reproductive  
26 health education, and the religious doctrines influencing these beliefs. The study also aimed to  
27 gauge their knowledge of family planning and modern contraceptive methods.

28

29 In September 2021, data was collected from religious figures purposefully selected from 11 districts  
30 and the Western Area Urban through 16 focus group discussions. The discussions, initially  
31 conducted in local languages, were translated and transcribed into English. The data was then  
32 subjected to a thematic analysis using NVIVO 12 software.

33

34 The analysis revealed diverse opinions, both across different religions and within specific  
35 denominations. A common thread was the general support from both Christian and Muslim leaders  
36 for natural birth spacing methods, with some reservations about artificial techniques. There were  
37 clear distinctions in beliefs among denominations: Catholics largely considered artificial  
38 contraceptives to be against the divine will, while Pentecostals and some Muslims found them  
39 permissible under certain conditions.

40

41 The findings underscore the potential of religious leaders in Sierra Leone to act as influential  
42 advocates for family planning, given their support for natural birth spacing. To maximize the impact  
43 of advocacy efforts, the study suggests a focus on engaging Pentecostals and Muslim leaders  
44 rather than Catholics. Additionally, religious leaders with professional backgrounds in health or  
45 education appear more receptive to modern contraceptive methods and could be particularly  
46 valuable allies in these endeavours.

47

## 48 Introduction

49 Globally, it is estimated that family planning (FP) can prevent up to one-third of maternal deaths  
50 [1], while birth spacing of at least 36 months can reduce under-five mortality by 25% [2,3]. High  
51 fertility is an important determinant of both maternal and child mortality and morbidity [4]. From  
52 1990 to 2019, the global fertility rate declined from 3.2 to 2.5 children per woman and from 6.3 to  
53 4.6 in sub-Saharan Africa [5]. In Sierra Leone, the total fertility rate declined from 6.6 in 1990 to  
54 4.2 in 2019 [6,7] and the modern contraceptive prevalence rate (mCPR) for all women increased  
55 from 17.4 in 2012 to 26% in 2022 [8].

56

57 Sierra Leone has one of the highest maternal mortality ratios in the world (717 per 100,000 live  
58 births) coupled with high neonatal (31 per 1,000), infant (75 per 1,000), and under-five (108 per  
59 1000) mortality rates, in 2021 [7]. This represents a significant improvement from previous years  
60 and is a testament to the efforts being made to improve health outcomes for this target group.  
61 However, there is plenty of room for improvement in addressing the underlying causes of maternal  
62 mortality, such as poverty, poor nutrition, limited access to FP services and women's ability to make  
63 decision regarding their own health.

64

65 Family Planning (FP) as defined by the World Health Organization 'allows individuals and couples  
66 to anticipate and attain their desired number of children and the spacing and timing of their births.  
67 It is achieved through the use of contraceptive methods and the treatment of involuntary infertility'  
68 [9]. It is one of the single most important determinants of child survival, yet a quarter (25%) of  
69 women in Sierra Leone have an unmet need for family planning (32% for birth spacing and 14%  
70 for limiting births) [7]. The teenage pregnancy rate in the country is 34%, and teenage childbearing  
71 contributes to 40% of maternal deaths [8]. About 48% of young women (20-24 years of age) have  
72 become mothers before the age of 18 [10]. Early childbearing prevents girls from achieving their  
73 full potential, contributing to high school dropout rates and the consequently low status of women  
74 and reduced income generation [10].

75

76 Recognizing the importance of informed choices in reproductive health, the Sierra Leone Ministry  
77 of Basic and Senior Secondary Education (MBSSE) recently introduced a policy and curriculum for  
78 comprehensive sex education (CSE) and facilitation of access to reproductive health service  
79 delivery in schools. This CSE policy was developed to help young people make informed sexual  
80 and reproductive health choices, which is central in reducing teenage pregnancy, early child  
81 marriage and improving government and civil society responsiveness to women's and girls' needs  
82 [11].

83

84 Universal access to FP is central to gender equality and women's empowerment, and a critical  
85 factor in reducing poverty. It reinforces women's right to determine the spacing of their children and  
86 ultimate family size. In developing countries, millions of women want to delay or avoid pregnancy  
87 but do not have access to or are not using an effective method of FP. In sub-Saharan Africa, 58  
88 million women have an unmet need for family planning, and within the region, the 39 poorest  
89 countries' unmet need for family planning has increased since 2008 [11]. Addressing the unmet  
90 need for family planning requires a multi-faceted approach that increases access to education,  
91 information, and healthcare services for women and families, and includes addressing cultural and  
92 social norms as well as religious beliefs that often deter uptake of modern contraceptives.

93 Most women in Sierra Leone know that good quality, modern contraceptives are available in their  
94 communities, yet choose not to access it or to discontinue its use [7]. Religious belief is a key factor  
95 affecting women's uptake and continuation of modern contraceptives; 9.3% of women discontinue  
96 family planning based on religious grounds [7]. Studies have shown that religious leaders  
97 command respect in their communities, and community members are likely to listen to them about  
98 family planning and the use of modern contraceptives [13]. They are strategically placed to either  
99 promote or deter uptake of modern contraceptives.

100 A systematic review seeking to clarify the role of religion and religiosity on fertility and contraceptive  
101 use in continental Sub-Saharan African countries found the following: 1) Islam followers have

102 higher fertility rates than followers of Christianity (Catholics having the highest fertility among  
103 Christians, followed by Protestants and Apostolic) 2) Religion exerts an influence on fertility rates  
104 and contraceptive use, but the magnitude and nature of this influence can differ significantly from  
105 one country to another 3) Within the context of Islam a stronger degree of religiosity and higher  
106 fertility rates correlate with decreased contraceptive use, unlike among Christians where this is not  
107 the case [14].

108

109 This study, therefore, sought to explore the religious leaders' perspectives on the family planning  
110 methods and contraceptive use among women of childbearing age including their knowledge of the  
111 different methods, what they believe their religion says about family planning and contraceptive  
112 use; and the Quranic and Biblical references they use to justify their views. It also sought to examine  
113 their views on reproductive and sexual health education and to identify champions and entry points  
114 for family planning. This knowledge will provide policymakers with critical insights into potential  
115 entry points for engaging with religious leaders. Understanding how to leverage the influential  
116 positions of these leaders can enhance the effectiveness of family planning advocacy and influence  
117 the decisions made by individuals and couples.

## 118 **Materials and Methods**

119 This qualitative study used focus group discussion (FGD) to allow flexibility for respondents to  
120 explain what they knew to be important, the intricacies of the issues, their moral values and religious  
121 beliefs.

122 Purposeful sampling allowed the researcher to recruit participants that were knowledgeable about  
123 either Islam or Christianity. More Christian religious leaders were recruited as the study was  
124 commissioned by the Christian Health Association of Sierra Leone (CHASL) whose primary interest  
125 was understanding the perspectives of Christian religious leaders, while a comparison of their views  
126 with Muslim leaders was of secondary interest. One FGD was conducted with 6-8 religious leaders

127 in each district headquarter-town. To avoid contention, we held FGDs with Muslim and Christian  
128 scholars separately.

129

130 An FGD guide that included the study information, consent procedures and a participants'  
131 demography sheet was used. The guide included open-ended questions and probes on knowledge  
132 and perception of family planning, modern contraception and references from the Quran and Bible,  
133 as shown in Figure 1. The guide was developed in English and translations of key phrases in all  
134 the main local languages were agreed on with data collectors and documented during training. The  
135 FGDs were conducted in either Krio, Temne, or Mende, depending on the preferred local language  
136 of the respondents. In-depth responses were obtained about participants' thoughts and feelings to  
137 gain insights into their beliefs and attitudes towards FP services. Data collectors took notes in  
138 English and the interviews were recorded and translated and transcribed to English by two native  
139 speakers of the local language.

140 Recordings were stored in an encrypted telephone device and later transferred to the secure  
141 OneDrive. All audio transcriptions were also stored in the same drive and only shared with the  
142 study team.

143

144 All FGDs were audio recorded to ensure accuracy and completeness of the collected information,  
145 and supplementary notes were taken to capture immediate insights and contextual details. The  
146 audio recordings from the FGDs were listened to and directly translated into English transcripts.  
147 These transcriptions were then cross-referenced with the written notes to ensure accuracy and  
148 completeness of the data. Responses were analyzed using NVivo 12 software to synthesize results  
149 into major themes using thematic content analysis.

150

151

## 152 Results

153 A total of 116 religious leaders participated (Muslims: 32, Christians: 84) in September 2021. 84  
154 Christian religious leaders, representing nine different denominations, were included in the study.  
155 The breakdown of Christian denominations are shown in Table 1. Most of Christian participants  
156 identified as Pentecostal, accounting for 38.1% (n=32) of the participants. Methodist (14.3%, n=12)  
157 and Wesleyan (13.1%, n=11) were the next most common denominations, followed by Baptist  
158 (10.7%, n=9). The Anglican denominations represented 6% of the sample (n=5) Catholic and  
159 Evangelical denominations each represented 7.1% (n=6, respectively) of the total participants.  
160 Protestant participants were relatively few, accounting for only 2.4% (n=2) of the total. A single  
161 participant identified as non-denominational, constituting 1.2% of the total participant population.

162

163 **Table 1: Christian Denominations**

| Denomination       | Number of Participants | Percentage of Total |
|--------------------|------------------------|---------------------|
| Anglican           | 5                      | 6.0                 |
| Baptist            | 9                      | 10.7                |
| Catholic           | 6                      | 7.1                 |
| Methodist          | 12                     | 14.3                |
| Evangelical        | 6                      | 7.1                 |
| Non-denominational | 1                      | 1.2                 |
| Pentecostal        | 32                     | 38.1                |
| Protestant         | 2                      | 2.4                 |
| Wesleyan           | 11                     | 13.1                |
| <b>Total</b>       | <b>84</b>              | <b>100</b>          |

164

165 Thirty-two Muslim religious leaders participated, but their denominations or sects were not noted  
166 as the main purpose of their participation was to contrast their views with those of Christian religious

167 leaders. It should be acknowledged for contextual relevance that the majority of Muslims in Sierra  
168 Leone predominantly identify with either the Shia or Sunni branches of Islam.

169

170 The results have been categorized into religious leaders' knowledge of contraceptive use and birth  
171 spacing; perceptions of modern contraceptives; perception of sex education; and identifying  
172 champions and entry points for FP advocacy and service delivery.

173

### 174 **Religious leaders' knowledge of family planning methods**

175 The results show that religious leaders have a fair understanding of FP and the different types of  
176 modern contraceptives. They categorized FP methods into 1) Artificial/modern contraceptives that  
177 include pills, injections (Depo-Provera), and implants (locally known as Captain Band), intrauterine  
178 devices (coil), male and female condoms and 2) natural and traditional methods such as  
179 withdrawal, calendar method (i.e., menstrual cycle tracking to avoid sex during the fertile days),  
180 abstinence, and lactational amenorrhea method. They stated that the natural methods are safe and  
181 advantageous as they have no side effects.

182

183 The analysis revealed varying opinions between Christian denominations and Muslims about family  
184 planning and use of modern contraceptives. However, an area of concurrence was that all Christian  
185 and Muslim religious leaders fully support the practice of birth spacing and could outline associated  
186 benefits. For example, ensuring the woman has good reproductive health and time to take care of  
187 the children with the limited resources available, instead of having "*wan na belle, wan na back*"  
188 (*one in the belly and one on the back – a local slogan for inadequate spacing*) Wesleyan Christian,  
189 Western Area Urban.

190



191 In the exploration of religious leaders' perspectives on family planning, several themes emerged  
192 that demonstrated an in-depth understanding of the diverse benefits associated with family  
193 planning. The succinct but profound statements encapsulate the various dimensions of family  
194 planning, encompassing not only its health benefits but also its wider socioeconomic implications.

195

196 *"It saves lives and improves the health of women that have given birth. It also allows parents to*  
197 *take care of their homes and time for children to grow properly before another pregnancy. Family*  
198 *planning also prevents girls from dropping out of school and achieving their goal"* Catholic Christian,  
199 Western Area Rural.

200 *"The relevance of spacing birth is for instance, if you have space for your children for more than*  
201 *three years, the older children will be able to take care of the younger ones, and the parents too*  
202 *will be able to cater for their children. These are the things we preach to our congregation about*  
203 *the importance of birth spacing."* – Muslim, Falaba.

204 Another Muslim leader cited a recommended breastfeeding duration of 30 months, which  
205 surpasses the World Health Organization's recommendation of breastfeeding "up to the age of  
206 two years and beyond." This extended breastfeeding period aligns closely with the three-year  
207 birth spacing mentioned by other participants in the study.

208 *"To me, giving birth is very important because it's planned by God. Allah said we should marry*  
209 *and give birth to children, and the Quran said (2:223) when a woman is pregnant, she should*  
210 *breastfeed for at least 30 months, if we follow this, it will be okay."*- Muslim, Kailahun

211 Overall, religious leaders voiced that birth spacing is acceptable, however as shown below they  
212 less open to the concept limiting births.

## 213 **Religious leaders' views on use of contraceptives for limiting** 214 **births**

215 Limiting births refers to individuals or couples who have completed their families and do not plan to  
216 have any more pregnancies. Religious leaders shared that children are from God and any means  
217 of limiting their existence is prohibited and not of God's ways, as stated:

218 *"Psalm 127- the child is a heritage from God, and we believe in procreation, so anything*  
219 *that destroys it, like the contraceptive, is not of God and it is against the Christian beliefs,*  
220 *and Genesis 1:28 states "be fruitful and replenish the earth." – Catholic Christian, Port Loko*

221 Others Christian leaders especially those from Evangelical and Protestant denominations held  
222 contrary views; they stated that even though the Bible (Genesis 1:28) states children are a blessing  
223 from God and that people should be fruitful and multiply, they did recognise that these 'commands'  
224 should not be taken literally as the word of God is allegorical.

225 *"The commandment of God in the Old Testament is we should be fruitful and multiply. By looking*  
226 *at the perspective of fruitfulness and multiply, at that time, there were not enough people on planet*  
227 *earth, now, there are lots of people on planet earth, and some people are complaining that we are*  
228 *overpopulated. Instead of having so many children, one or two will be enough. By looking at the*  
229 *current socio-economy, a bag of rice costs New Leones 370-500 (~\$40-\$50). If you give birth to 30*  
230 *children, how many days will it take to finish a bag of rice?" – Pentecostal Christian, Koinadugu.*

231 Another Pentecostal Christian Leader suggested that not having the means to take care of your  
232 children is also a sin and, thus, the importance of having financial security before deciding to have  
233 children.

234 *"According to Pentecostal, which is my denomination, it preaches against bearing children*  
235 *and leaving them unattended... that is a sin. Also, failing to provide the fulfilling demands*  
236 *of your children is not sinful but criminal. This is what our religion (Pentecostal) says about*  
237 *childbearing and family planning." – Pentecostal Christian, Bonthe*

238 The Pentecostal Christian beliefs above differed significantly to those of Muslims who stated that  
239 Islam is against family planning if the intention is due to fear of provision for and income to take  
240 care of the children, then it is haram, as the Quran 17:31 states:

241 *"Kill not your children for fear of want: We shall provide sustenance for them as well as for you.*  
242 *Verily, the killing of them is a great sin".* Muslim, Western Rural.

243 Overall, the Islamic perspective was that family is acceptable if done following Islamic practice (for  
244 example 30 months of breastfeeding) and with a good intention of safeguarding the woman's  
245 health, however it should not be done out of fear of not being able to provide for the family.

246 Some Muslim respondents also stated that the use of modern contraceptives is a way of aborting  
247 a child, which is against the teaching of Islam. Abortion is a sin. However, this view was not  
248 universal among Muslim participants.

249 Finally, Catholic Christians expressed that while they were in favour of family planning both for  
250 spacing and limiting, their main concern was the means by which family planning is achieved – the  
251 use of modern contraceptives which are artificial and have many side effects.

252

## 253 **Perceptions of modern contraceptive methods**

254 The Catholic Christians leaders stated that the Bible only supports natural FP, and anything that  
255 suppresses procreation artificially goes against the word of God.

256 *"At the Catholic Church .... we accept family planning, but we are against the methods that*  
257 *are being used. Of course, the natural way is natural, and there is no intervention from a*  
258 *human being. The others are artificial."* Christian, Western Area Urban

259 A Muslim leader also stated that during the time of the Holy Prophet, his disciples used the  
260 withdrawal method, and when the prophet was asked about it, he said, "Not out of all the semen a  
261 child is formed, and if Allah willed to create something, nothing would stop Him from doing it [15]."

262 This indicates willingness on the part of Muslims to accept family planning using natural methods.

263 Christian religious leaders of all denominations and Muslim religious leaders also voiced concerns  
264 about side effects, infertility, and the professional capacity of health workers. One of the primary  
265 concerns expressed by several Christians was the negative effects of modern contraception; these  
266 adverse effects include difficulty conceiving, stomachache, infertility, severe internal bleeding,  
267 blockages, cancer, irregular menstrual cycle, and changes in blood pressure.

268 *"Some disadvantages are like when someone has taken the pills or injectables, they are*  
269 *faced with a lot of risks, and they would affect your blood pressure because there are*  
270 *hormones that have been injected into your system that may affect you negatively."* –  
271 Methodist Christian, Western Urban.

272 Some of the religious leaders mentioned side effects of women having big stomach bloating and/or  
273 abdominal growth or fibroid and disruption of their menstruating cycle. They believe that such  
274 bloating affects their beauty and will lead to them being barren or infertile. Concerns about cancer  
275 from intrauterine devices (IUDs) and the possibility of the IUD entering into the stomach, causing  
276 excess bleeding to death.

277 *"Sometimes this IUD they use may cause abortion, and this may happen when the coil*  
278 *gets displaced into the stomach while the woman gets pregnant at the same time. This*  
279 *would lead to abortion because there are two conflicting foreign bodies competing for*  
280 *space, so one has to be displaced, leading to miscarriage."* - Catholic Christian, Western  
281 Urban.

282 Christian leaders' additional concerns about FP include condom getting stuck and condom tearing  
283 during intercourse, putting one at risk of sexually transmitted diseases and unwanted pregnancy.  
284 Another serious concern is out-of-pocket expenses resulting from side effects and complications.  
285 Furthermore, they assert that not all health workers have the capability to provide high quality  
286 counselling and modern contraceptive administration.

287 *"Some nurses cannot insert the implant properly, causing bleeding and unrest"*, Catholic  
288 Christian, Western Urban.

289 Another major concern raised was the perceived indiscriminate dissemination of modern  
290 contraception to school-aged children in schools. They believe that access to contraceptives  
291 encourages sexual activity, urging children to test out what they have learnt about. They suggested  
292 this practice will eventually destroy the lives of children, causing them to be disobedient to their  
293 parents. They assert that providing contraceptives to underage children without parental consent  
294 is inappropriate.

295 *"Government give children, even the underage, without any parental consent. This has*  
296 *negative implications on the children ...as parents, we see some it has some health effects*  
297 *on them. My child is an example of it; they gave her an implant without my notice. I was*  
298 *made to understand about it the day she got an attack which left her unconscious."* –  
299 Baptist Christian, Port Loko.

300 The influence of modern contraceptives on children was another critical concern. Some believed  
301 that modern contraceptives are making them promiscuous and causing them (particularly girls) to  
302 get loose in the streets. Furthermore, modern contraceptives divert students' attention away from  
303 their studies and allow them to disregard preventative measures and the fear of God or become  
304 wayward.

305 *"Family planning is like giving our wives and daughters licenses for promiscuous behaviour;*  
306 *as a result, the women and/or daughters become unruly and disrespectful to their*  
307 *husband"*. Muslim, Falaba.

308 However, some argued that FP is good and, if done correctly, can lead to positive outcomes such  
309 as ensuring a prosperous future for children by allowing them to gain an education and support.  
310 Additionally, they stated that FP is good for school-going children and society as it assists in the  
311 prevention of teenage pregnancies and allows girls to reach their potential.

312

## 313 **Identifying champions and entry points for family planning**

314 The findings indicate that there are religious leaders (both Christian and Muslim) who advocate for  
315 the use of modern contraceptives because of their professional lives, working as nurses or  
316 teachers. They are key influencers who can raise awareness of FP, therefore making them potential  
317 champions for FP in their communities.

318 Religious leaders mentioned that they are aware of their potential role to improve sexual and  
319 reproductive health. However, some stated that they had not been involved enough to take up the  
320 dissemination of messages at the community level.

321 *"We are always with the people, and they listen to us. Therefore, Government should*  
322 *involve us more in more complicated issues like FP to be the community ambassadors,*  
323 *[and] then you will see how the uptake will improve"* Muslim, Western Rural.

324 Religious leaders further mentioned that they have several ways of reaching many people to  
325 promote FP practice.

326

## 327 **Preaching family planning to the congregation**

328 Muslim leaders stated that they sometimes preach about FP while Catholics believe that FP is not  
329 a suitable topic to preach in the church and that it can cause division in the church. On the other  
330 hand, Pentecostal Christians were willing to preach about FP, especially the natural methods, as  
331 long as it does not promote promiscuous behaviour. The Pentecostal added that preaching about  
332 FP is not always done from the pulpit because the congregation is a combination of children and  
333 adults.

334 *"...for instance, in a congregation, sometimes we as pastors do find it difficult to go too*  
335 *deep to talk about the uses of these contraceptives that we have been discussing because*  
336 *we have young people in our midst, and as a pastor, we know that family planning is good,*  
337 *but we have to discuss that with people that are married and also the uses of these*

338           *contraceptives. We just cannot explain that in the church where we have young people that*  
339           *are not married, that will want to prompt them to fornicate, which is not good."*- Christian,  
340           *Kono*

341   The Muslim respondents added:

342           *"There is a subject that we call 'fedarr'; it is one of the materials we use to preach about*  
343           *family planning, its usefulness and how to go about it. We have another subject which is*  
344           *called Lull; Lull tells them how to use family planning and also how to go about it. We treat*  
345           *those two subjects." – Muslim, Pujehun*

346   The respondent also mentioned that they preach to unmarried youths that are sexually active to  
347   use contraceptives for them to continue schooling and prevent them from giving birth out of  
348   wedlock, especially for ruling/chieftaincy households. We told them that FP is good using the  
349   famous quote, "if you plan yourself, it will be beneficial. If you fail to plan yourself, it's not good."

350           *"They should join family planning as it will prevent you from giving birth to a child out of*  
351           *wedlock because, in the ruling house, children out of wedlock will not be eligible to*  
352           *participate in any chieftaincy activities. It will be a disgrace to the child in future; therefore,*  
353           *we encourage them to use family planning to prevent such awkward scene happening" -*  
354           *Muslim, Pujehun*

## 355   **Discussion about family planning in different religious groups**

356   Some churches, for example, the United Methodist Church, have a policy where they allocate some  
357   time for health talks before each sermon on various topics.

358           *"After Ebola Virus Disease, the United Methodist Church has made it a policy for anyone*  
359           *who wants to mount the pulpit to give a health talk for 10 minutes before preaching the*  
360           *actual sermon. Before you go to the pulpit, we sit together and agree on a particular health*  
361           *talk; that is the time we address our members about family planning. Little by little, the*  
362           *church is getting acquainted with lots of health information."*-Christian, Moyamba

363 The Pentecostals also have a platform called RETREAT which they utilise to preach to their  
364 members about FP.

365 *"Yes, at Pentecostal, we preach to our members about family planning during service or*  
366 *through a platform called RETREAT. This a platform where we assemble our youths-young*  
367 *adults, women's wing. There are different sectors of retreats. The singles retreat is meant*  
368 *for those that are not married, where they are taught about restraining or bearing a child*  
369 *for someone who has not tied the knot with you. There is another retreat called couples'*  
370 *retreat, whereby married couples come together and listen to advice delivered. "- Christian,*  
371 *Bonthe*

372 Religious assemblies such as youth wing, women's and men's groups, and persons with disabilities  
373 also discuss FP. The main topic discussed is abstinence for unmarried youth. They should maintain  
374 celibacy as sex is for married people, which implies that FP is for married couples. In addition, the  
375 youths are advised about moral values and religious positions on FP and/or health practitioners are  
376 invited to discuss this and other different health topics.

377

## 378 **Religious leaders' perspective on reproductive and sex** 379 **education**

380 The majority of Christians (all denominations) supported sex education in schools and believed in  
381 the new school curriculum that integrates comprehensive sex education. They understood the  
382 adverse effects of not being well informed about reproductive health and sex, including unwanted  
383 pregnancies, which could be detrimental, especially to the life of the girl child and their parents.

384 *"Yes, my church supports that because it is a burden to the child and the parents when a*  
385 *child bears a child when she has not attained the age and the capacity. This may lead to*  
386 *dropout in schools because here in the provinces, when a child gets pregnant, the parents*  
387 *consider that as the end of her education, and they would never care about her continuing*  
388 *to school again."*– Christian, Bombali



389 The minority of Christian leaders who opposed sex education in schools expressed that if children  
390 become aware of sex and are supplied with modern contraception, it reduces children fear of  
391 becoming pregnant, making them more sexually active with multiple partners, losing focus in their  
392 education, boys taking drugs for longevity, becoming thieves and drug addicts. On the other hand,  
393 the Islamic position was that sex education is not suitable for children; rather, such information  
394 should be provided to adults instead of children.

395 *"It's not good. Because that is the main reason, underage girls are becoming pregnant*  
396 *nowadays. Even as parents, we are doing it secretly. That's not good; if they were mature,*  
397 *it's different. But underage children will lead to doing bad things. If they are above 18 years,*  
398 *that's not bad. This has brought so many problems because these children are now*  
399 *practising it, and it's not good at all." Muslim, Kailahun*

400

## 401 Discussion

402 Religious leaders' knowledge of modern contraceptive methods was similar to the rest of the  
403 population, where 98% of married women and 99% of men know at least one method of family  
404 planning [7]. Their understanding of FP is in line with religious leaders across the globe that  
405 describe FP as a means of voluntary prevention or spacing pregnancy [16].

406

407 Both Muslim and Christian religious leaders supported birth spacing – this is an important point of  
408 agreement between with FP proponents. It provides an entry point for influencing religious leaders  
409 to be more supportive of FP. However, there are distinct barriers to cross with different religious  
410 groups and denominations, and we set out our contemplations on these barriers below. Some  
411 Muslim leaders have stated that modern contraceptive is permissible only if there are health  
412 implications (i.e. if there is a high chance of losing either the mother or the child's life during  
413 pregnancy or delivery) [17]. A study in Burkina Faso also revealed that religious leaders believe  
414 that modern contraceptive methods are against the principles of religion [18]. These contrasting

415 viewpoints indicate a complex interplay between religious doctrine and the acceptability of modern  
416 contraceptive methods. While some Muslim leaders see a space for modern contraceptives in  
417 specific health-related circumstances, other religious figures, as evidenced in Burkina Faso, remain  
418 firmly against their use on religious grounds. This divergence suggests that religious teachings on  
419 contraception are not monolithic but may vary significantly both within and across religious  
420 communities, thus presenting both challenges and opportunities for family planning advocacy.

421

422 Catholics believe that the only way to achieve birth spacing is through natural methods. Natural FP  
423 methods are known to be less effective than modern contraception. However, religious leaders  
424 argued that modern methods come with many side effects, whereas natural methods do not. A  
425 study in Kenya, Nigeria, and Senegal, reported side effects and health concerns such as "long-  
426 term infertility", "safety reason", "end up with health problems (48–74%)", "dangerous to women's  
427 health (47–72%) and "contraceptives can harm your womb (37–62%)" as the main reason for non-  
428 use of modern contraceptive [19].

429 This tension between the effectiveness of modern contraception and the perceived safety of natural  
430 methods presents a complex landscape for policymakers and family planning advocates.

431 While the Catholic stance may limit the uptake of highly effective modern contraceptives, it also  
432 opens a door for compromise by promoting natural family planning methods to a sector of the  
433 population that might otherwise avoid birth control altogether. Given the religious leaders' concerns  
434 about the side effects of modern contraceptives, there is an opportunity for more nuanced  
435 conversations and educational programs. These could focus on debunking myths and providing  
436 evidence-based information about the safety profiles and side effect management of modern  
437 contraceptives. Moreover, this approach can help create a common ground to engage religious  
438 leaders as allies, allowing them to become more informed and possibly more receptive to other  
439 contraceptive methods over time. In essence, a tailored, evidence-based advocacy could serve as  
440 an entry point for engaging with religious communities that have reservations about modern  
441 contraceptive methods.

442 Pentecostal Christian leaders, on the other hand, appeared less doctrine-led and are more  
443 practical. They paid attention to economic factors highlighting that people should have the children  
444 they can afford. They then extrapolate that to say that having children that you cannot afford is a  
445 sin, but this is not backed by any biblical quote. The pragmatic orientation of Pentecostal Christian  
446 leaders toward family planning suggests that they may be more amenable to conversations about  
447 the implementation and promotion of modern contraceptive methods within their congregations.  
448 Their focus on the economic aspects of family planning, although not explicitly grounded in religious  
449 doctrine, provides a crucial avenue for engagement. The absence of doctrinal rigidity may serve as  
450 a more accessible entry point for policymakers and family planning advocates to present evidence-  
451 based information. The key to effectively engaging with Pentecostal leaders would be to frame the  
452 conversation around their existing concerns. Highlighting how modern contraceptive methods can  
453 be both safe and economically beneficial may help align their religious messaging with broader  
454 public health goals. Evidence-based discussions about the safety of modern contraceptives and  
455 options for side effect management could be particularly persuasive in this context. Such an  
456 approach would not only facilitate the religious leaders' endorsement of family planning but could  
457 also lead to active advocacy, thereby amplifying the reach and impact of family planning initiatives.

458

459 Some Muslim leaders stated clearly that fear of responsibility is not a reason for limiting births.  
460 Rather they believe that it is only acceptable if it will affect the health of the women. For Muslim  
461 leaders, therefore, the key messaging has to focus on the health of the woman. They are not in  
462 principle against artificial methods – so they could be influenced to promote modern FP methods  
463 through a birth spacing lens. There were also some gender considerations; according to some  
464 Muslim leaders, contraceptive prevention is permissible only if the husband approves, and using  
465 different methods is not a problem as long as it is not with the intention of permanent effect. Any  
466 method that causes permanent sterilization without any proper medical reason is prohibited or  
467 haram. This illustrates clearly that it would be difficult to influence Muslim religious leader to  
468 promote permanent methods such as sterilization.

469 The position articulated by some Muslim leaders indicates complex yet promising entry points for  
470 public health practitioners and policymakers who aim to promote family planning. The leaders'  
471 openness to birth spacing using modern contraceptive methods, if framed within the context of  
472 women's health, provides a strategic avenue for engagement. Given that their religious beliefs do  
473 not wholly reject the use of artificial methods, Muslim leaders could serve as potential allies in  
474 normalizing the conversation around modern contraceptives in their communities. However, the  
475 conditions set forth by these Muslim leaders also present specific challenges. The requirement for  
476 spousal approval and the prohibition against methods leading to permanent sterilization underscore  
477 the sociocultural and religious constraints that need to be navigated carefully. These insights imply  
478 that advocacy and education should not only be aimed at the leaders themselves but must also  
479 engage the broader community, including men, to build a consensus around the health benefits of  
480 family planning.

481

482 Furthermore, considering that permanent sterilization methods like tubectomy or vasectomy are  
483 'haram' (forbidden) without a substantial medical rationale, any policy or program targeting Muslim  
484 communities in Sierra Leone would need to be explicit about the reversible nature of most modern  
485 contraceptives, or otherwise focus on those methods that are temporary and reversible.

486

487 A major challenge to overcome with Muslims, however, is the education of adolescents on sexual  
488 reproductive health. The education of adolescents on sexual reproductive health among Muslim  
489 communities presents a unique dilemma, requiring a delicate and culturally sensitive approach. It's  
490 important to reframe the conversation around the objective of such education: empowerment  
491 through knowledge. Family Planning (FP) program developers will need to make a compelling  
492 argument that the education provided is not a permissive gateway to sexual activity but rather an  
493 essential element of life education. Educating adolescents on how their bodies work can instill a  
494 sense of responsibility, bolster self-esteem, and equip them with the tools to make informed choices  
495 as they mature. This aligns well with values that are universally upheld across religious affiliations,  
496 such as personal responsibility and the preservation of human dignity. Hence, finding common

497 ground in shared values could be a promising entry point for engaging Muslim religious leaders on  
498 the importance of comprehensive sexual reproductive health education for adolescents.

499

500 For all religious leaders, their concerns and misconceptions about artificial methods interfering with  
501 the natural processes that God has provided must be addressed. Furthermore, their concerns that  
502 modern contraceptives have side effects and lead to health problems and that providers are not  
503 well trained to provide the services will need to be addressed. Religious leaders' knowledge and  
504 acceptance of birth spacing due to health risks of poorly spaced pregnancies can be an entry point  
505 to provide guidance on modern contraceptive use and debunking misconceptions. This will be the  
506 basis on which they can be encouraged to promote FP, thereby helping to reduce preventable  
507 deaths of mother and child. They could develop sermons/ Khutbah on 'family health and well-being'  
508 with references from the Bible or the Quran that can use to address FP issues amongst their  
509 congregations.

510

511 Potential champions within the religious community are those who, in addition to being pastors or  
512 imams, also have other career roles, such as teachers or nurses. These dual-career individuals,  
513 because of their education or health professional training, understand the need for reproductive  
514 health education and the important role it plays in the reduction of teenage pregnancies, maternal  
515 and child mortality. However, their technical knowledge could also position them well to make  
516 informed arguments against family planning.

## 517 **Study limitations**

518 The Christian Health Association of Sierra Leone (CHASL) commissioned the study, assisted in  
519 the study design and recruitment of participants. As a result, more Christian religious leaders were  
520 recruited as the primary interest was understanding their perspectives compared to their Muslim  
521 counterparts was of secondary interest.

## 522 **Conclusion**

523 The understanding of family planning among religious leaders in Sierra Leone is largely reflective  
524 of the wider population's views, presenting both challenges and opportunities for policy intervention.  
525 Given the pre-existing acceptance of 'natural' methods for birth spacing within this cohort, there lies  
526 a significant opportunity to cultivate these leaders as champions for family planning. They could  
527 serve as influential change agents in promoting both the initiation and sustained use of family  
528 planning services within their respective communities. While the data suggests that Pentecostal  
529 and Muslim leaders may be more amenable to modern contraceptive methods compared to their  
530 Catholic counterparts, a multi-pronged approach will be required to engage each religious group  
531 effectively. Leveraging their acceptance of 'natural' methods as a starting point could provide an  
532 entryway for more comprehensive discussions around modern family planning options.

## 533 **Acknowledgements**

534 The authors would like to thank all the Religious Leaders including FOCUS 1000 ISLAG and  
535 CHRISTAG for their collaboration during the field survey. Our appreciation to all the field workers  
536 for their cooperation and patience during the fieldwork

537

538

## 539 **Disclosure**

540 The author reports no conflicts of interest in this work.

541

542

## 543 **Availability of data and materials:**

544 IfD archives all original FGD guides and transcripts on site, which will not be shared to maintain  
545 confidentiality of respondents.

546 **Competing interests:**

547 All the authors have confirmed that there is no competing interest.

548 **Funding:**

549 Funding for this study was made possible by the generous support from Christian Health  
550 Association for Sierra Leone (CHASL).

551 **Ethics approval and consent to participate:**

552 Ethical clearance was obtained from the Sierra Leone Ethics and Scientific Review Committee at  
553 the Ministry of Health and Sanitation. The optional nature of the study (that participants could refuse  
554 to answer questions if they were uncomfortable, that from the study at any time in which case none  
555 of their data would be used) was explained verbally. All the respondents granted informed written  
556 consent to participate, and all data was anonymized. Confidentiality was also assured.

557

558

559 **References**

560 1. Chola L, et al. Scaling Up Family Planning to Reduce Maternal and Child  
561 Mortality: The Potential Costs and Benefits of Modern Contraceptive Use in  
562 South Africa. PLoS ONE. 2015;10: e0127199.

563 2. Rutstein SO. Effects of preceding birth intervals on neonatal, infant and under-  
564 five years mortality and nutritional status in developing countries: evidence from  
565 the demographic and health surveys. Int J Gynaecol Obstet. 2005;89: 7-24. doi:  
566 10.1016/j.ijgo.2004.11.012.

- 567 3. Collumbien M, Gerressu M, Cleland J. Non-use and use of ineffective methods  
568 of contraception. In: Ezzati M, Lopez AD, Rogers A, Murray CJL, editors.  
569 Comparative quantification of health risks: Global and regional burden of disease  
570 attributable to selected major risk factors. Geneva: World Health Organisation;  
571 2004. pp. 1255–1320.
- 572 4. Haines MR. The Relationship Between Infant and Child Mortality and Fertility:  
573 Some Historical and Contemporary Evidence for the United States. In: From  
574 Death to Birth: Mortality Decline and Reproductive Change; 2022.
- 575 5. United Nations Department of Economic and Social Affairs, Population  
576 Division. World Fertility and Family Planning 2020. New York: United Nations;  
577 2020. ST/ESA/SER.A/440.
- 578 6. The World Bank Data. Fertility rate, total (births per woman) - Sierra Leone  
579 [Internet]. The World Bank Group; 2022 [cited 2023 August 27]. Available from:  
580 <https://data.worldbank.org/indicator/SP.DYN.TFRT.IN?locations=SL>.
- 581 7. Statistics Sierra Leone (Stats SL), ICF. Sierra Leone Demographic and Health  
582 Survey 2019. Freetown, Sierra Leone, and Rockville, Maryland, USA: Stats SL  
583 and ICF; 2020.
- 584 8. Track20.org [Internet]. Avenir Health; 2022 [cited 2023 August 27]. Available  
585 from: [https://track20.org/Sierra\\_Leone](https://track20.org/Sierra_Leone).
- 586 9. Publichealth.com.ng [Internet]. Public Health Nigeria; 2020 Jun 15 [cited 2023  
587 August 27]. Available from: [https://www.publichealth.com.ng/who-definition-of-](https://www.publichealth.com.ng/who-definition-of-family-planning/)  
588 [family-planning/](https://www.publichealth.com.ng/who-definition-of-family-planning/).



- 589 10. UNFPA Sierra Leone. UNFPA: Population matters. 2022. Available from:  
590 <https://sierraleone.unfpa.org/en/node/6136>.
- 591 11. UNFPA Sierra Leone. Sierra Leone takes positive steps to roll-out  
592 comprehensive sexuality education in school curricula [Internet]. 2019 July 19.  
593 Available from: [https://sierraleone.unfpa.org/en/news/sierra-leone-takes-positive-](https://sierraleone.unfpa.org/en/news/sierra-leone-takes-positive-steps-roll-out-comprehensive-sexuality-education-school-curricula)  
594 [steps-roll-out-comprehensive-sexuality-education-school-curricula](https://sierraleone.unfpa.org/en/news/sierra-leone-takes-positive-steps-roll-out-comprehensive-sexuality-education-school-curricula).
- 595 12. Halperin DT, Stover J, Reynolds HW. Benefits and costs of expanding  
596 access to family planning programs to women living with HIV/AIDS. AIDS.  
597 2009;23: S123-S130. doi: 10.1097/01.aids.0000363785.73450.5a.
- 598 13. Egeh AA, Dugsieh O, Erlandsson K, Osman F. The views of Somali religious  
599 leaders on birth spacing – a qualitative study. Sex Reprod Healthc. 2019;20: 27-  
600 31. doi: 10.1016/j.srhc.2019.02.003.
- 601 14. Turner N. Influence of Religion and Religiosity on Fertility and Contraceptive  
602 Use in Continental Sub-Saharan Africa. University of Gothenburg; 2021.
- 603 15. Shaykh Ibn Uthaymen. The use of contraceptives to Avoid pregnancy.  
604 Islamic Knowledge – Islam, Sunnah, Salafiyah. 2015. Available from:  
605 [https://abdurrahman.org/2015/05/21/the-use-of-contraceptives-to-avoid-the-](https://abdurrahman.org/2015/05/21/the-use-of-contraceptives-to-avoid-the-pregnancy-shaykh-ibn-uthaymeen/)  
606 [pregnancy-shaykh-ibn-uthaymeen/](https://abdurrahman.org/2015/05/21/the-use-of-contraceptives-to-avoid-the-pregnancy-shaykh-ibn-uthaymeen/).
- 607 16. Family Planning 2020. Faith and Family Planning: Working Together To Drive  
608 Progress Post-2020. FP 2030; 2019.
- 609 17. Arbab AA, Bener A, Abdulmalik M. Why Islam Permitted Birth Control.  
610 Prevalence, awareness and determinants of contraceptive use in Qatari women.  
611 Eastern Mediterranean Health Journal. 2011;17(1).

- 612 18. Barro A, Nana NG, Soubeiga D, Bationo N, Pafadnam Y, Pilabre H, Ngangue  
613 PA. Knowledge, beliefs and perceptions of religious leaders on modern  
614 contraceptive use in Burkina Faso: A qualitative study. Pan Afr Med J. 2021;39:  
615 216. doi: 10.11604/pamj.2021.39.216.27082.
- 616 19. Gueye A, Speizer SI, Corroon M, Okigbo CC. Belief in Family Planning Myths  
617 at the Individual and Community Levels and Modern Contraceptive Use in Urban  
618 Africa. Int Perspect Sex Reprod Health. 2015;41(4): 191–199.

619

620

621
